1 **Long title:** A revised understanding of *Tribolium* morphogenesis further

2 reconciles short and long germ development

3

4 **Short title:** A significant revision to our understanding of short germ

5 embryogenesis

6

7

8 **Author:** Matthew A. Benton

9

10 **Author affiliation:** Department of Zoology, University of Cologne, Cologne, NRW, Germany

11

12 **Corresponding author:** Matthew A. Benton, [matthewabenton@gmail.com](mailto:matthewabenton@gmail.com)

13

## 14 **Author summary**

15 In many animals, certain groups of cells in the embryo do not directly contribute to adult  
16 structures. Instead, these cells generate so-called ‘extra-embryonic tissues’ that support and  
17 facilitate development, but degenerate prior to birth/hatching. In most insect species,  
18 embryos are described as having two major extra-embryonic tissues; the serosa, which  
19 encapsulates the entire embryo and yolk, and the amnion, which covers one side of the  
20 embryo. This tissue structure has been widely reported for over a century, but detailed  
21 studies on the amnion are lacking. Working in the beetle *Tribolium castaneum*, I used long-  
22 term fluorescent live imaging, cell tracking and differential cell labelling to investigate  
23 amnion development. In contrast to our current understanding, I show that most cells  
24 previously thought to be amnion actually form large parts of the embryo. In addition, I show  
25 how these cells ‘flow’ as a whole tissue and contribute to elongation of the embryo, and how  
26 only a relatively small number of cells form the actual amnion. Lastly, I describe how my  
27 findings show that despite exhibiting substantial differences in overall structure, embryos of  
28 *Tribolium* and the fruit fly, *Drosophila melanogaster*, utilise a conserved set of  
29 morphogenetic processes.

30

## 31 **Abstract**

32 In *Drosophila melanogaster*, the germband forms directly on the egg surface and solely  
33 consists of embryonic tissue. In contrast, most insect embryos undergo a complicated set of  
34 tissue rearrangements to generate a condensed, multi-layered germband. The ventral side  
35 of the germband is embryonic, while the dorsal side is thought to be an extraembryonic  
36 tissue called the amnion. While this tissue organisation has been accepted for decades, and  
37 has been widely reported in insects, its accuracy has not been directly tested in any species.

38 Using live cell tracking and differential cell labelling in the short germ beetle *Tribolium*  
39 *castaneum*, I show that most of the cells previously thought to be amnion actually give rise  
40 to large parts of the embryo. This process occurs via the dorsal-to-ventral flow of cells and  
41 contributes to germband extension. In addition, I show that true ‘amnion’ cells in *Tribolium*  
42 originate from a small region of the blastoderm. Together, my findings show that  
43 development in the short germ embryos of *Tribolium* and the long germ embryos of  
44 *Drosophila* is more similar than previously proposed. Dorsal-to-ventral cell flow also occurs  
45 in *Drosophila* during germband extension, and I argue that the flow is driven by a conserved  
46 set of underlying morphogenetic events in both species. Furthermore, the revised *Tribolium*  
47 fatemap that I present is far more similar to that of *Drosophila* than the classic *Tribolium*  
48 fatemap. Lastly, my findings show that there is no qualitative difference between the tissue  
49 structure of the cellularised blastoderm and the short/intermediate germ germband. As  
50 such, the same tissue patterning mechanisms could function continuously throughout the  
51 cellularised blastoderm and germband stages, and easily shift between them over  
52 evolutionary time.

53

## 54 **Introduction**

55 Insects are the most speciose phylum of animals and display remarkable diversity in adult  
56 morphology [1]. Insect embryo development is also very diverse, particularly in the stages  
57 leading to the formation of the elongated, segmented embryo (called the germband) [2].  
58 The molecular and morphogenetic basis of this process is best understood in the fly  
59 *Drosophila melanogaster*. In this species, a predominantly hierarchical chain of patterning  
60 events specifies nearly all segments more-or-less simultaneously at the syncytial blastoderm  
61 stage [3]. Cellularisation takes place near the end of this process, after which point

62 morphogenetic events such as germband extension (GBE) occur (see Fig 1 for schematic  
63 summary). The *Drosophila* mode of development is termed long germ development and is  
64 fairly representative of most true flies [4]. In contrast, the vast majority of insects undergo  
65 short or intermediate germ development, meaning that only a handful of segments are  
66 specified at the blastoderm stage and the remaining segments are specified sequentially as  
67 the germband elongates [5].

68 Short germ development has been best studied in the beetle *Tribolium castaneum*,  
69 and recent research has shown that development in this species is more similar to  
70 *Drosophila* than previously thought. In *Drosophila*, GBE is predominantly driven by the  
71 mediolateral intercalation of ectodermal cells (i.e. convergent extension), although cell  
72 deformation along the anterior-posterior (AP) axis and cell divisions are also involved [6–11].  
73 In contrast to this, *Tribolium* germband elongation was previously thought to be driven by  
74 the so-called ‘growth zone’ at the posterior of the germband [12]. Now, however, it is clear  
75 that *Tribolium* germband elongation is also predominantly driven by mediolateral cell  
76 intercalation (see Fig 1 for schematic summary of *Tribolium* development) [13–15].  
77 Furthermore, in both *Tribolium* and *Drosophila*, this intercalation requires the striped  
78 expression of a specific group of Toll genes (so-called Long Toll/Loto class genes) [16,17].

79

80 **Fig 1. Schematics of development in *Drosophila* and *Tribolium*.** The two left columns show  
81 schematics of *Drosophila* embryos from the uniform blastoderm stage to the extended  
82 germband stage. The right three columns show schematics of *Tribolium* embryos at  
83 comparable developmental stages. The schematics in the right-most column depict  
84 dissected, flatmounted embryos. Red arrows display cell/tissue movement. The question  
85 marks highlight two regions (the *Drosophila* embryo/amnioserosa border in the cephalic

86 furrow region, and the dorsoventral position of the *Tribolium* embryo/amnion border) where  
87 the tissue boundaries are unknown/undescribed. Several features have been omitted,  
88 including the yolk, mesoderm gastrulation, anterior gut formation and appendage  
89 formation. The *Drosophila* fatemap is based on data from [18] and the references therein.  
90 Refer to text for additional details.

91

92 It is highly likely that germband elongation mediated by cell intercalation is  
93 homologous in these two species, and probably in other arthropods, as well [17]. As such, I  
94 will hereafter refer to *Tribolium* 'germband elongation' as 'germband extension'/GBE,  
95 unifying the *Drosophila/Tribolium* terminology. In addition, as there is no evidence for a  
96 qualitatively different 'growth zone' in *Tribolium* (i.e. a specialised zone of volumetric  
97 growth), I will refer to the posterior unsegmented region as the 'segment addition zone'  
98 (SAZ) [19–21].

99 Despite the similarities described above, there are substantial differences in the  
100 embryonic fatemaps of these two species (Fig 1). In *Drosophila*, almost the entire  
101 blastoderm is fated as embryonic tissue, and only a small dorsal region is fated as  
102 extraembryonic tissue (termed the amnioserosa) [18]. In contrast, in *Tribolium*, roughly the  
103 anterior third of the blastoderm gives rise to an extraembryonic tissue called the serosa [22].  
104 Of the remaining blastoderm, a large dorsal region is thought to give rise to a second  
105 extraembryonic tissue called the amnion, with only the remaining ventral tissue giving rise to  
106 the embryo itself [23–25]. Like the amnioserosa, the serosa and the amnion are proposed to  
107 support the embryo during development, but are thought to degenerate prior to hatching  
108 and not contribute to any larval or adult structures [19,26,27].

109           *Drosophila* and *Tribolium* also exhibit dramatic differences in the morphogenetic  
110 events occurring during early development (Fig 1). When GBE occurs in *Drosophila*, the  
111 germband stays at the surface of the egg and the amnioserosa largely remains in place. In  
112 *Tribolium*, on the other hand, germband extension begins with a process called embryo  
113 condensation, during which the embryonic ectoderm and presumptive amnion (together  
114 termed the ‘germ rudiment’) form the germband (see Fig 1; for a detailed description see  
115 [14,28]). Several concurrent morphogenetic events underlie embryo condensation. The  
116 embryonic ectoderm condenses towards the ventral side of the egg via both mediolateral  
117 cell intercalation and a cuboidal-to-columnar cell shape transition. Simultaneously, epithelial  
118 folding and tissue involution occurs, causing the presumptive amnion to fold over the  
119 embryonic ectoderm. During these movements, the serosa cells undergo a cuboidal-to-  
120 squamous transition to spread over the entire egg surface. The final stage of embryo  
121 condensation coincides with closure of the serosa (serosa window stage), which appears to  
122 involve a supracellular actomyosin cable [14].

123           The differences in fatemap and tissue folding described above show that both  
124 fatemap shifts and reductions in early morphogenetic events have contributed to the  
125 evolution of the long germ mode of development found in *Drosophila*. However, it is  
126 important to note that *Drosophila*, regarding the extraembryonic tissues, represents an  
127 extreme case of reductive evolution, which is characteristic only for higher cyclorrhaphan flies  
128 [29]. More basally branching flies form both an amnion and a serosa, while still exhibiting  
129 the long germ mode of development (for a review see [26]). For example, in the scuttle fly  
130 *Megaselia abdita*, both an amnion and serosa form, but while the serosa spreads over the  
131 egg surface as in *Tribolium*, the amnion remains at the dorsal side of the embryo, similar to  
132 the *Drosophila* amnioserosa [30–33]. Such intermediate topologies help to explain the

133 evolution of the situation in *Drosophila*, where all extraembryonic cells remain at the dorsal  
134 side.

135         Understanding how these differences evolved is integral to understanding the short-  
136 to-long germ transition, but in order to study how this occurred, we first need to understand  
137 how these tissues develop in each species. The form and function of the *Tribolium* serosa has  
138 been analysed in several studies [22,34,35]. The amnion, on the other hand, has proven  
139 harder to analyse, and the precise embryo/amnion boundary at the blastoderm stage is  
140 unknown. However, a defined boundary between embryo and amnion has been proposed to  
141 exist from when the germband forms (Fig 1) [23]. Cells in the ventral half of the germband  
142 (ventral with respect to the germband dorsoventral [DV] polarity, but dorsal with respect to  
143 the egg) are thought to give rise to all embryonic structures, while cells in the dorsal half of  
144 the germband (dorsal with respect to the germband DV polarity, but ventral with respect to  
145 the egg) are thought to form the amnion [25,36,37]. This germband structure has been  
146 described in many insects over the past century and is proposed to represent the core  
147 conserved structure of short/intermediate germ embryos (reviewed in [2,38,39]). However,  
148 the proposed boundary between cells fated to become embryo and those fated to become  
149 amnion has not been directly tested.

150         Here, I investigate the development of the presumptive amnion in *Tribolium* using a  
151 combination of fluorescent live imaging and fate mapping techniques. To my great surprise, I  
152 find that the majority of the cells previously described as ‘amnion’ actually form large parts  
153 of the embryo proper. Using fate-mapping experiments, I show that true ‘amnion’ cells  
154 originate from a very small domain of the blastoderm, just as the *Drosophila* amnioserosa  
155 cells do. I also show that the movement of cells from the ‘amnion’ side of the germband to  
156 the ‘embryo’ side of the germband occurs via the large scale flow of the ectodermal

157 epithelium. Lastly, I describe the underlying causes of this flow, and show how this tissue  
158 movement is likely homologous to the dorsal-to-ventral tissue flow that occurs during  
159 *Drosophila* GBE.

160

## 161 **Results**

### 162 **Live cell tracking reveals movement of ‘amnion’ cells into the embryo**

163 To examine the development of the *Tribolium* presumptive amnion in detail, I carried out  
164 high resolution live imaging of embryos transiently labelled [14] with a fluorescent histone  
165 marker (H2B-venus) to label nuclei. My goal was to track presumptive amnion cells from the  
166 blastoderm stage onwards. However, it was not possible to accurately track the majority of  
167 cells throughout embryo condensation and GBE, due to the extensive morphogenetic  
168 rearrangements that take place during this process. Instead, I focused on the stage  
169 immediately following condensation when the germband has formed, and analysed the  
170 embryonic region where the presumptive amnion is closest to the surface of the egg.  
171 Specifically, I tracked over 200 presumptive amnion cells from the central region of the  
172 germband from the closure of the serosa window until after the formation of the thoracic  
173 segments (over 11 hours of development; Fig 2 and S2 Movie). As previously described [14],  
174 the germband and yolk exhibit pulsatile movements during this period, as well as rotating  
175 within the serosa (S1 Movie).

176         The presumptive amnion initially consists of many tightly packed cells, which become  
177 increasingly spread out during GBE (S2 Movie, Fig 2(A-C)). However, rather than remaining  
178 restricted to the ‘amnion territory’, many of the tracked cells moved around the edge of the  
179 germband into the ‘embryo territory’. Differential labelling of tracked cells clearly showed  
180 that these cells that moved around the germband edge became part of the embryo proper



181 (S2 Movie and Fig 2(A-C)). The cells that joined the ‘embryo territory’ became tightly packed,  
182 continued to divide, and formed embryonic structures (S3 Movie and Fig 2(D-F)). In contrast,  
183 cells that remained in the ‘amnion territory’ became squamous and stopped dividing. The  
184 nuclei of these latter cells became enlarged (S3 Movie and Fig 2(D-F)), suggesting that they  
185 underwent endoreplication to become polyploid, as seen in the *Tribolium* serosa and in the  
186 *Drosophila* amnioserosa [18,24]. In addition, several germband nuclei underwent apoptosis  
187 (S3 Movie) as has been described in fixed embryos [40]. These results show that many of the  
188 cells previously thought to constitute extraembryonic amnion give rise to embryonic  
189 structures.

190       Since the epithelium formerly termed ‘amnion’ is made up cells that will variously  
191 form amnion, dorsal ectoderm and dorsolateral ectoderm, it is not accurate for the entire  
192 tissue to be called ‘amnion’. Therefore, I will refer to this part of the germband as the ‘dorsal  
193 epithelium’, based on the tissue’s location at the dorsal side of the germband (with respect  
194 to the DV polarity of the germband rather than the egg). This term ‘dorsal epithelium’ is  
195 simply a spatial designation, and comes with no implicit assumptions about the identity of  
196 the tissue nor the final fate of the tissue. It is also important to keep in mind that the dorsal  
197 epithelium is continuous with the ventral epithelium.

198

199 **Fig 2. Live cell tracking reveals contribution of ‘amnion’ cells to embryonic tissue. (A-F)**

200 Time series from fluorescent live imaging of a *Tribolium* embryo expressing H2B-venus. The  
201 serosa nuclei located above the germband have been manually removed from these frames  
202 (by deleting them from individual z-stack slices), but left in the surrounding territory  
203 (arrowhead in (A+A')). (A'-C') show optical transverse sections of the respective frame at the  
204 position shown by the dashed line (the surface of the egg is to the left). In (A-C), all nuclei

205 that lie in a region of the ‘amnion territory’ in (A) have been tracked and differentially  
206 labelled depending on whether they become part of the embryo (magenta; labels disappear  
207 when nuclei join the germband), become located at the edge of the germband (yellow) or  
208 remain in the ‘amnion territory’ (cyan). In (D-F), a line of nuclei that lie in the ‘amnion  
209 territory’ in (D) have been tracked and differentially labelled depending on whether they  
210 become part of the embryo (coloured points; daughter cells are labelled in same colour as  
211 parent) or remain in the ‘amnion territory’ (cyan; no division takes place). Note that in panel  
212 (D), the orange spot is mostly hidden below the yellow spot because the nuclei in that region  
213 are partially overlapping when viewed as projections. The first frame of the timelapse was  
214 defined as timepoint 0. In (A-F), embryos are oriented based on the AP/DV polarity of the  
215 egg with anterior to the left and dorsal to the top. (A-C) are maximum intensity projections  
216 of one egg hemisphere. (D-F) are average intensity projections of 46 microns to specifically  
217 show the germband. Scale bars are 50  $\mu\text{m}$ .

218

### 219 **Differential cell labelling confirms widespread dorsal-to-ventral cell movement**

220 My next question was whether the movement of cells from the dorsal epithelium to the  
221 ventral epithelium occurs throughout the AP axis or is just limited to the thoracic region. The  
222 extensive movements of the germband made it difficult to track individual cells accurately at  
223 the anterior and posterior poles. To overcome this problem, I combined differential cell  
224 labelling with long term fluorescent live imaging to follow small groups of nuclei throughout  
225 development. Specifically, I microinjected mRNA encoding a nuclear-localised  
226 photoconvertible fluorescent protein (NLS-tdEos) into pre-blastoderm embryos to uniformly  
227 label all nuclei, then photoconverted a small patch of nuclei at different positions along the  
228 AP axis at the final uniform blastoderm stage. I then performed long term confocal live

229 imaging of both the unconverted and photoconverted forms of the fluorescent protein  
230 throughout the period of GBE (or longer). Unlike that of *Drosophila*, the *Tribolium* egg shell  
231 does not show any dorsoventral (DV) polarity, and I was therefore unable to specifically  
232 target particular locations along the DV axis. Instead, I opted for a brute-force approach and  
233 performed the photoconversion experiment at unknown DV positions for 50-150 embryos at  
234 each of the following AP positions: 75% egg length (EL) from the posterior pole, 50% EL, 25%  
235 EL, and close to the posterior pole. I then used the resulting live imaging data to determine  
236 the approximate DV position of the photoconverted cells. Using a new live imaging set up  
237 (see Materials and Methods), I obtained the same range of hatching rates as I typically  
238 obtain for other microinjection experiments (approximately 80%, [14]), even after  
239 continuous confocal live imaging for almost the entirety of *Tribolium* embryonic  
240 development (3.5 days; S4 Movie). Both unconverted and photoconverted protein persisted  
241 throughout germband extension and retraction, although fluorescent signal faded over time.  
242 I have included various examples from this data set in S1-S3 Figures. In addition, I have made  
243 the raw confocal data for a large number of timelapses available online (>300 embryos, >700  
244 GB of data [41]) for the benefit of the community. This data will likely prove valuable for a  
245 wide range of research projects.

246         When I examined clones initially located in the dorsal epithelium, I found that  
247 movement of cells from the dorsal epithelium to the ventral epithelium occurred throughout  
248 the posterior of the embryo during GBE (Fig 3(A-F), S5 Movie). I also observed the same  
249 movements at the anterior of the germband (Fig 3(G-J)), although I have focused my analysis  
250 on the middle and posterior parts of the embryo. Together with the cell tracking data, these  
251 results show that most of what was previously thought to be ‘amnion’ is in fact embryonic

252 tissue, and that cells move from the dorsal epithelium to the ventral epithelium throughout  
253 the germband (summarised in Fig 3(K,L)).

254

255 **Fig 3. Differential cell labelling reveals widespread movement of cells from the dorsal**

256 **epithelium to the ventral epithelium.** (A-J) Time series from fluorescent live imaging of two

257 *Tribolium* embryos expressing NLS-tdEos showing unconverted protein (magenta) and

258 photoconverted protein (cyan). In (A-F') a patch of nuclei at the posterior-dorsal region of

259 the blastoderm were photoconverted. Panels (A-F) show the posterior region of the

260 germband during late GBE and panels (A'-F') show optical transverse sections made at the

261 position of the dashed line at each timepoint (roughly following the same nuclei). Serosa

262 nuclei are marked by white crosses in the transverse sections. In (G-J), a patch of nuclei at

263 the anterior-lateral region of the blastoderm were photoconverted. Panels (G-J) show the

264 anterior of the germband during condensation and GBE. In both embryos, all converted

265 nuclei are initially located in the dorsal epithelium, but most move into the ventral

266 epithelium during GBE. (K-L) Schematics showing the classic and revised models of the

267 *Tribolium* germband (presumptive amnion is shown in purple, presumptive embryo is shown

268 in grey, red arrows show the newly discovered tissue flow). The first frame of the timelapses

269 was defined as timepoint 0. In (A-J), embryos are oriented based on the AP/DV polarity of

270 the egg with anterior to the left and dorsal to the top. In (A'-F'), the surface of the egg is

271 oriented to the left. In (K-L), schematics show flatmounted germbands with the focus on the

272 dorsal epithelium, the anterior to the left and the orthogonal sections are oriented with the

273 dorsal half of the germband to the left. (A-J) are maximum intensity projections of one egg

274 hemisphere. Scale bars are 50  $\mu$ m.

275

276 **Mediolateral cell intercalation occurs throughout GBE**

277 During my live imaging, ectodermal cell clones became elongated along the AP axis over  
278 time, as previously reported in a *Tribolium* study that used a non-live imaging cell clone  
279 method [15]. However, this study found that “labelled ectodermal cells ... rarely mix with  
280 unlabelled cells” even as clones became greatly elongated [15]. In contrast, I frequently  
281 observed non-converted nuclei in the midst of labelled nuclei (Fig 3, S1-S3 Figs).

282 To test whether the pattern I observed was caused by mediolateral cell intercalation,  
283 I tracked the nuclei of abutting rows of ectodermal cells in the SAZ during formation of the  
284 abdominal segments (50 cells in total, tracked for 3.5 hours; Fig 4 and S6 Movie). This  
285 analysis clearly showed that, as during embryo condensation [14], cells intercalated between  
286 their dorsal and ventral neighbours. Together with the photoconversion dataset, these  
287 results show that extensive mediolateral cell intercalation takes place throughout GBE to  
288 drive the convergent extension of the ectoderm.

289

290 **Fig 4. Mediolateral cell intercalation occurs in the SAZ during GBE.** Time series from  
291 fluorescent live imaging of a *Tribolium* embryo expressing NLS-tdEos showing the SAZ during  
292 abdominal segment formation. Coloured points mark tracked nuclei. During the timelapse,  
293 nuclei underwent apicobasal movement but I observed no cell delamination. Note that the  
294 same embryo is shown in Fig 3(A-F). The first frame of the timelapse was defined as  
295 timepoint 0. The embryo is oriented based on polarity of the visible region of the germband.  
296 Panels show maximum intensity projections of 15  $\mu\text{m}$  to specifically show the germband.  
297 Abbreviations as follows: germband (GB); anterior (ant); posterior (post); medial (med);  
298 lateral (lat). The scale bar is 50  $\mu\text{m}$ .

299

300 ***Tribolium serpent* may mark true ‘amnion’**

301 As described earlier, cells that remained in the dorsal epithelium became squamous, and this  
302 cell shape change occurred progressively along the AP axis (Fig 5(A)). This change in cell  
303 shape may be a sign of maturation of true ‘amnion’. While characterising cell fate markers, I  
304 found that the *Tribolium* ortholog of the GATA factor *serpent* (*Tc-srp*) exhibited spatial and  
305 temporal expression dynamics that were very similar to those of the potential ‘amnion’ (i.e.  
306 progressive flattening of cells, Fig 5(B), S4 Fig).

307 At the end of GBE, all but the most posterior cells of the dorsal epithelium were  
308 squamous and *Tc-srp* seemed to be expressed in dorsal epithelium cells along nearly the full  
309 length of the germband (S4 Fig(l<sub>2</sub>)). However, this latter finding was difficult to confirm as  
310 most of the dorsal epithelium is lost during embryo fixation at this embryonic stage  
311 (presumably due to the fragility of the tissue). I also found *Tc-srp* to be expressed in several  
312 other domains, including in the presumptive endoderm (S4 Fig).

313 In *Drosophila*, *serpent* is also expressed in extraembryonic tissue (the amnioserosa)  
314 [42–45], and, therefore, *Tc-srp* may mark ‘true’ extraembryonic amnion. However, future  
315 work is required to confirm whether this putative amnion degenerates prior to hatching (as  
316 is required to be defined as extraembryonic). For simplicity, I will refer to this tissue as  
317 ‘amnion’ for the remainder of this text.

318

319 **Fig 5. Development of the putative amnion.** (A-A'') *Tribolium* embryo transiently expressing  
320 the membrane marker GAP43-YFP. (A) shows an overview of the whole egg, (A') shows the  
321 dorsal epithelium of the same embryo at the position of the white box, (A'') is an optical  
322 sagittal section at the position of the dashed line in (A') showing the apical-basal height of  
323 cells of the dorsal epithelium. (B) *Tc-srp* (red) expression in a flatmounted *Tribolium*

324 germband also showing nuclei (DAPI, blue). The strong *Tc-srp* signal in nuclei may suggest  
325 nuclear or peri-nuclear localisation of the transcript, or it may be due to the cell body being  
326 flattened. Aside from the strong patch of anterior medial expression (which is from cells  
327 beneath the embryonic ectoderm), all visible expression is in the putative amnion  
328 epithelium. (C-E) Extended germband stage *Tribolium* embryos transiently expressing NLS-  
329 tdEos showing unconverted protein (magenta) and photoconverted protein (cyan). In each  
330 embryo, the clone of converted cells spans the entire amnion. (C<sub>1-2</sub>) show both sides of the  
331 same embryo in which a 6 nuclei wide patch of dorsal-most cells located at 50% EL were  
332 photoconverted at the blastoderm stage. (D) shows an embryo in which a 3 nuclei wide  
333 patch of dorsal-most cells located at 25% EL were photoconverted at the blastoderm stage.  
334 (E) shows an embryo in which a 3 nuclei wide by 6 nuclei long patch of dorsal-most cells  
335 located at roughly 2-10% EL were photoconverted at the blastoderm stage. In (A) and (C-E),  
336 embryos are oriented based on the AP/DV polarity of the egg with anterior to the left and  
337 dorsal to the top. In (A''), the surface of the egg is oriented to the bottom. In (B), the anterior  
338 of the germband is to the left. (A) is an average intensity projection of one egg hemisphere.  
339 (A') is an average intensity projection of 6  $\mu\text{m}$  to specifically show the dorsal epithelium. (B)  
340 is a maximum intensity projection of the whole germband. (C-E) are maximum intensity  
341 projections of one egg hemisphere. Abbreviations are: ventral ectoderm (VE) and dorsal  
342 ectoderm (DE). Scale bars are 50  $\mu\text{m}$ .

343

#### 344 **A revised *Tribolium* amnion fatemap**

345 To determine which blastoderm cells give rise to the amnion, I analysed 85 embryos in which  
346 the dorsal and dorsolateral blastoderm cells were labelled by NLStdEos photoconversion as  
347 described above. As I was unable to determine the precise DV position of the

348 photoconverted cells at the blastoderm stage, I (1) examined embryos at the extended  
349 germband stage (when the mature amnion had formed), (2) determined the embryos in  
350 which photoconverted nuclei spanned the full DV width of the amnion (but were not  
351 observed in the embryonic tissue), and (3) checked the initial size of the photoconverted  
352 patch of nuclei (for a schematic of this approach, see S5 Fig).

353 I found that amnion cells arose from a very small domain of dorsal-most cells (that  
354 tapers from its anterior to posterior extent) and from a narrow strip of cells between the  
355 presumptive embryo and presumptive serosa (summarised in Fig 6 and S6 Fig). At 50% EL,  
356 only approximately the 6 most dorsal cells (approximately 8% of the circumference of the  
357 blastoderm) gave rise to all amnion cells stretching from one side of the thorax to the other  
358 (Fig 5(C), S1 Fig). Nearer to the posterior of the blastoderm (25% EL), even fewer cells gave  
359 rise to amnion (approximately 3 of the most dorsal cells; approximately 6% of the  
360 circumference; Fig 5(D), S2 Fig). The posterior limit of the amnion was difficult to define, as  
361 although some cells from approximately 5-10% EL appeared to become amnion (Fig5(E)),  
362 these cells condensed posteriorly towards the hindgut during germband retraction, and  
363 might have contributed to the hindgut tissue (S3 Fig, S7 Movie). I was unable to  
364 unambiguously determine the fate of these cells. At the anterior of the embryo, I found that  
365 a narrow strip of 1-2 cells between the presumptive embryo and presumptive serosa also  
366 gave rise to amnion (Fig 3(G-J)). While substantial additional work will be required to define  
367 a complete blastoderm fatemap for *Tribolium*, my findings clearly demonstrate that the  
368 'amnion' domain is drastically smaller than previously proposed.

369

370 **Fig 6. Schematics showing the revised *Tribolium* amnion fatemap and germband model.**

371 Schematics drawn as in Fig 1 to show the revised fatemap (top row; drawn directly from the



372 numbers described in the text) and germband model based on the results of this manuscript.  
373 Note that the posterior amnion/embryo boundary is unclear. The schematics of the  
374 flatmounted germbands are drawn with the focus on the dorsal epithelium. See text for  
375 additional details, and S6 Fig for an extended figure with the classic and revised models side-  
376 by-side.

377

## 378 **Discussion**

379 In this article, I have shown that a majority of the cells currently thought to be  
380 extraembryonic amnion actually give rise to embryonic tissue. Movement of these cells from  
381 the dorsal side of the germband to the ventral side was visible in live cell tracking and  
382 differential cell labelling experiments. My results also indicate that the true amnion region  
383 differentiates progressively along the AP axis during GBE, as evidenced by differences in cell  
384 behaviour and the expression of the gene *Tc-srp*. Lastly, presumptive amnion cells  
385 predominantly originate from a small domain on the dorsal side of the blastoderm.

386

## 387 **A revised understanding of the short germ embryo**

388 The revision to the *Tribolium* blastoderm fatemap that I describe is essentially a quantitative  
389 shift in our understanding of where cell fate boundaries lie along the DV axis. In the revised  
390 fatemap (Fig 6, S6 Fig), the proportion of the blastoderm that gives rise to the presumptive  
391 amnion is much smaller than previously thought. The presumptive amnion domain is,  
392 therefore, remarkably similar in size to the amnioserosa domain of the *Drosophila*  
393 blastoderm fatemap [18]. However, it is important to recognize that fatemaps such as those  
394 presented here show a static picture of a dynamic process. There is no evidence that the  
395 presumptive amnion is specified at the blastoderm stage in *Tribolium*. Instead, the

396 progressive changes in cell shape and activation of *Tc-srp* expression in the dorsal epithelium  
397 of the germband suggest that the amnion is specified progressively along the AP axis during  
398 GBE. Progressive specification of DV cell fates during GBE fits with previous hypotheses  
399 [36,46], and analysis of how this process occurs represents an exciting avenue of future  
400 research (a possible mechanism for DV patterning during GBE is discussed in S1 Text).

401 In contrast to the fatemap revision, the observation that cells move from the dorsal  
402 half of the germband to the ventral half of the germband represents a qualitative shift in our  
403 understanding of development in short/intermediate germ insects. In the classic model of  
404 short/intermediate germ development, the germband was thought of as a more-or-less flat  
405 sheet of ectodermal cells (with mesoderm underneath) covered by the extraembryonic  
406 amnion. Because of this, the entire dorsal epithelium is routinely removed during embryo  
407 preparation, or not included in descriptions of gene expression patterns and embryonic  
408 phenotypes. Based on the new data presented here, it is obvious that we have been  
409 discarding or ignoring large parts of the embryo. Furthermore, the movement of cells from  
410 the dorsal epithelium into the ventral epithelium must be contributing to GBE, and is,  
411 therefore, a key aspect of the extension and overall development of the germband that has  
412 thus far been missed.

413 The revised model of the germband does present some technical challenges for  
414 future work on short/intermediate germ embryo. The flattened geometry of the germband  
415 makes it difficult to image both the dorsal and ventral epithelium using bright-field  
416 microscopy approaches. However, this problem can be overcome either by using  
417 fluorescence based techniques and confocal microscopy or by mechanical sectioning of the  
418 germband. Both approaches have been shown to work well in *Tribolium* (for examples see  
419 [13,47] and the results in this manuscript). In the rest of this article, I discuss why the revised

420 fatemap and cell flow accord well with what we know about *Tribolium* development, and  
421 outline the implications of this discovery on our understanding of the evolution of insect  
422 development.

423

#### 424 **The cellular and molecular causes of tissue flow unify the blastoderm and the germband**

425 The revised model of the *Tribolium* germband reconciles the blastoderm and germband  
426 stages. The ectoderm of the germband is a continuous epithelium, which means that the  
427 movement of cells from the dorsal epithelium to the ventral epithelium occurs as a tissue  
428 level ‘flow’. Such dorsal-to-ventral tissue flow also occurs during embryo condensation in  
429 *Tribolium* [14], and I propose that the flow is caused by largely the same morphogenetic  
430 processes at both stages. The evidence for this hypothesis is summarised here, but for an  
431 extended discussion see S2 Text.

432         Three morphogenetic processes contribute to dorsal-to-ventral cell flow in *Tribolium*,  
433 and at least two of the three occur at both the blastoderm and germband stages. First,  
434 mediolateral cell intercalation occurs at both stages and causes tissue-wide convergence  
435 (along the DV axis) and extension (along the AP axis). This process requires two *Toll* genes  
436 that are expressed in rings around the entire blastoderm and germband epithelium [17].  
437 Second, tissue specific cell shape changes occur at both stages such that ventral/lateral cells  
438 become columnar and dorsal/dorsolateral cells become thinner (during condensation (S7 Fig  
439 )) or squamous (during GBE). The tissue level effect of these changes is contraction of the  
440 ventral/lateral ectoderm and spreading of the dorsal tissue. The flattening of  
441 dorsal/dorsolateral cells is likely regulated by BMP signalling, as not only does BMP activity  
442 correlate with the cell shape changes (see S2 Text), but functional disruption of BMP  
443 signalling components leads to uniform cell shape changes along the DV axis [25,48]. A third

444 major morphogenetic event is gastrulation of the mesoderm. This occurs along the ventral  
445 midline, and as gastrulation occurs, the ectoderm moves ventrally to seal the gap left in the  
446 epithelium [47]. At the stage when a complete germband has formed, gastrulation is  
447 complete along most of the embryo. However, current data suggests mesoderm gastrulation  
448 may be ongoing in the SAZ [47]. If true, the ongoing invagination would contribute to tissue  
449 flow in this region.

450         It is important to note that while each of the events described here is involved in the  
451 dorsal-to-ventral tissue flow, no single event is absolutely required for it. In the absence of  
452 cell intercalation, embryo condensation and thinning of dorsal/dorsolateral ectoderm still  
453 takes place, yielding abnormally wide and short germbands [17]. In the absence of tissue  
454 specific cell shape changes, condensation occurs in a more radially symmetrical manner  
455 yielding a tube-shaped germband that undergoes segment specification and convergent  
456 extension [25,48]. Finally, both condensation and GBE are only mildly affected in the  
457 absence of mesoderm specification [49]. This functional independence comes from each of  
458 the three processes being specified by different pathways (intercalation via segment  
459 specification, dorsal thinning via dorsal tissue specification, and gastrulation via ventral  
460 tissue specification). There may also be further, as yet undiscovered, morphogenetic events  
461 which also contribute to the dorsal-to-ventral tissue flow.

462

### 463 **Reconciling long and short germ development**

464 I propose that the dorsal-to-ventral tissue flow occurring during embryo condensation and  
465 GBE in *Tribolium* is homologous to the dorsal-to-ventral tissue flow that occurs during  
466 gastrulation and GBE in *Drosophila* (Fig 1). This conclusion is based on the flow being driven  
467 by a conserved set of morphogenetic events.

468           As described above, tissue flow in *Tribolium* is caused by (1) mediolateral cell  
469 intercalation, (2) tissue specific cell shape changes along the DV axis, and (3) gastrulation at  
470 the ventral side of the embryo. As described below, equivalent processes are all observed in  
471 *Drosophila* as well.

472           In *Drosophila*, *Toll*-mediated mediolateral cell intercalation causes tissue-wide  
473 convergence (along the DV axis) and extension (along the AP axis) of the ectoderm during  
474 GBE [16]. As in *Tribolium*, the periodic expression of the *Toll* genes is regulated by the pair-  
475 rule genes. Conservation at the level of tissue identity, morphogenetic process, and  
476 molecular control strongly suggest *Toll*-mediated cell intercalation to be homologous.

477           Cell shape changes are harder to compare between *Drosophila* and *Tribolium*,  
478 because unlike in most insects, cellularisation in *Drosophila* leads to the direct formation of  
479 columnar cells [18,50]. However, tissue-specific cell shape changes along the DV axis do  
480 occur in *Drosophila* and are dependent on BMP signalling ([51,52]; for a detailed description  
481 see S3 Text). While the intracellular effectors of these cell shape changes are unknown, use  
482 of BMP signalling for dorsal patterning is homologous in *Drosophila* and *Tribolium*, and many  
483 dorsal cell specification genes are conserved between these two species [48].

484           Last, *Drosophila* mesoderm gastrulation also occurs along the ventral midline, and  
485 causes lateral/dorsolateral ectoderm to move ventrally [51]. Similar to the tissue specific cell  
486 shape changes described above, the intracellular effectors of *Tribolium* mesoderm  
487 gastrulation are unknown, but the upstream patterning events and the tissue specification  
488 genes are highly conserved [36,49]. Furthermore, mesoderm gastrulation at the ventral  
489 region of the embryo is widely observed within the insects, and is undoubtedly a  
490 homologous process in each species [53].

491                   While I have focused on *Tribolium* and *Drosophila* here, evidence exists that  
492 the new findings in *Tribolium* may also apply to other short/intermediate germ insects. For  
493 example, in the intermediate germ bug *Oncopeltus fasciatus* (which forms a condensed,  
494 multi-layered germband with tissue topology similar to that of *Tribolium* [26]), the dorsal  
495 epithelium of the germband initially consists of a thick epithelium which progressively  
496 becomes squamous late during GBE [54]. These tissue-specific cell shape changes are likely  
497 the same as those occurring during *Tribolium* GBE. Furthermore, *Oncopeltus* pair-rule genes,  
498 Loto *Toll* genes and even segment polarity genes are expressed in rings around the entire  
499 germband prior to thinning of the dorsal epithelium [17,55,56]. The expression of these  
500 genes in the dorsal epithelium provides additional evidence that much of the *Oncopeltus*  
501 dorsal epithelium is made up of embryonic tissue. Future analyses of the molecular and  
502 morphogenetic drivers of GBE must analyse the entire germband, rather than focusing on  
503 the ventral half. In addition, further work will be needed to determine whether the new  
504 findings in *Tribolium* also apply to more basally branching insects such as crickets.

505

## 506 **Materials and Methods**

507 *Tribolium* animal husbandry, egg collection, and RNA *in situ* hybridisation was performed as  
508 previously described [17]. The *Tc-srp* ortholog was previously described [57] and was cloned  
509 into pGEM-t (Promega Reference A1360) with primers TCCCGCTGCTTTGATCTAGT and  
510 TGCGATGACTGTGACGTGTA. The *Tc-cad* ortholog was as previously used [14].

511                   The *H2B-ven* fusion was created by fusing the *D. melanogaster* histone *H2B* coding  
512 sequence (without the stop codon) from the published H2B-RFP [14] to the *venus*  
513 fluorescent protein [58] and cloning into the pSP64 Poly(A) (Promega Reference P1241)  
514 expression vector. The *NLS-tdEos* fusion was kindly provided by Matthias Pechmann.

515 Additional details and both plasmids are available upon request to M. Pechmann or myself.  
516 Capped mRNA synthesis was performed as previously described [14]. *H2B-ven* capped mRNA  
517 was injected at 1  $\mu\text{g}/\mu\text{L}$ , *NLS-tdEos* capped mRNA was injected at 2-3  $\mu\text{g}/\mu\text{L}$ .

518 Embryo microinjection was performed as previously described [14], with the  
519 following changes. Up to 100 dechorionated embryos were mounted on a rectangular  
520 coverslip (24 mm by 50 mm) that rested on a microscope slide. Water was allowed to dry off  
521 the embryos before they were covered in Voltalef 10S halocarbon oil and injected as usual.  
522 The coverslip (still resting on the slide) was then placed in a petri-dish (92 mm) containing a  
523 base layer of 1% agarose (dissolved in water) and placed at 30-32°C until the embryos were  
524 at the appropriate stage for imaging. The coverslip was then removed from the slide,  
525 inverted (so that embryos were face down), and quickly but gently placed on a lumox dish  
526 (50 mm; Sarstedt Reference 94.6077.410) that was sitting upside down. The corners of the  
527 coverslip rested on the raised plastic lip of the dish such that the membrane and embryos  
528 were close to each other but not touching. To ensure lateral stability of the coverslip during  
529 the timelapse recording, approximately 5-10  $\mu\text{L}$  of heptane glue (made by soaking parcel  
530 tape in heptane) was placed at each corner. Additional Voltalef 10S halocarbon oil was then  
531 added to fill any remaining space between the coverslip and the oxygen permeable  
532 membrane. This contraption was then stuck to a microscope slide (using double sided tape)  
533 for imaging on an upright microscope. This last step may be unnecessary depending on the  
534 microscope stage and orientation.

535 Live imaging was performed on an upright Zeiss SP8 confocal microscope equipped  
536 with Hybrid detectors in the Biocentre Imaging facility (University of Cologne). Image stacks  
537 of 15-50 focal planes with z-steps ranging from 2-10  $\mu\text{m}$  were taken with a 10x/0.3NA dry  
538 objective or a 20x/0.7NA multi-immersion objective at intervals of 5-45 minutes. The

539 temperature of the sample during imaging could not be carefully regulated, but was typically  
540 between 25-28 degrees. While this lack of temperature control is not ideal, it does not affect  
541 the findings presented in this manuscript.

542 Photoconversion of NLS-tdEos protein was performed by constantly scanning the  
543 region of interest for 20-30 seconds with the 405 wavelength laser at low power (5%). These  
544 settings were manually determined on the above microscope, and need to be determined  
545 independently on different systems. Photoconversions were performed during the final  
546 uniform blastoderm stage, as photoconversion prior to this resulted in substantial diffusion  
547 of the photoconverted protein during nuclei division. The positions of the different regions  
548 of the embryo (75% EL etc.) were determined by measuring the length of each embryo in the  
549 LASX software and selecting the appropriate region. Photoconversions were performed on  
550 all embryos on the coverslip before setting up the timelapse, which led to a 0.5-2 hour delay  
551 between performing the photoconversion and beginning the timelapse. As such, the  
552 positions of the photoconverted region at the first time point in the timelapses in this  
553 manuscript do not reflect the original region of photoconversion.

554 Imaging of fixed material was performed on an upright Zeiss SP8 confocal, an upright  
555 Zeiss SP5 confocal microscope and an inverted Zeiss SP5 confocal microscope. The  
556 *Drosophila gooseberry* expression patterns were kindly provided by Erik Clark and acquired  
557 as in [59]. Images and timelapses were analysed using FIJI [60] and Photoshop CS5. Manual  
558 cell tracking was performed on confocal hyperstacks with MTrackJ [61]. The figures were  
559 arranged and the schematics created using Inkscape.

560

561 **Acknowledgements**



562 I am very grateful to S. Roth for his generous support, and for the extensive and stimulating  
563 discussions throughout this project. I am also thankful to E. Clark for in-depth discussions  
564 and extensive feedback on the manuscript. I thank M. Pechmann for providing the *NLS-tdEos*  
565 construct. In addition, I thank M. Akam, M. Pechmann and S. Roth for comments on the  
566 manuscript, and B. Schmitt for comments on the schematics.

567

## 568 **References**

- 569 1. Grimaldi D, Engel M. Evolution of the Insects. Cambridge University Press; 2005.
- 570 2. Anderson DT. Embryology and Phylogeny in Annelids and Arthropod. Pergamon Press;  
571 1973.
- 572 3. Jaeger J. The gap gene network. Cell Mol Life Sci. 2011;68: 243–74.  
573 doi:10.1007/s00018-010-0536-y
- 574 4. Davis GK, Patel NH. SHORT, LONG, AND BEYOND: Molecular and Embryological  
575 Approaches to. Annu Rev Entomol. 2002; 669–99.
- 576 5. Peel AD, Chipman AD, Akam M. Arthropod segmentation: beyond the Drosophila  
577 paradigm. Nat Rev Genet. 2005;6: 905–16. doi:10.1038/nrg1724
- 578 6. Irvine KD, Wieschaus E. Cell intercalation during Drosophila germband extension and  
579 its regulation by pair-rule segmentation genes. Development. 1994;120: 827–41.  
580 Available: <http://www.ncbi.nlm.nih.gov/pubmed/7600960>
- 581 7. Bertet C, Sulak L, Lecuit T. Myosin-dependent junction remodelling controls planar cell  
582 intercalation and axis elongation. Nature. 2004;429: 667–671. Available:  
583 <http://dx.doi.org/10.1038/nature02590>
- 584 8. Collinet C, Rauzi M, Lenne P, Lecuit T. Local and tissue-scale forces drive oriented  
585 junction growth during tissue extension. Nat Cell Biol. 2015;17: 1247–1258.

- 586           doi:10.1038/ncb3226
- 587    9.     Butler LC, Blanchard GB, Kabla AJ, Lawrence NJ, Welchman DP, Mahadevan L, et al.
- 588           Cell shape changes indicate a role for extrinsic tensile forces in *Drosophila* germ-band
- 589           extension. *Nat Cell Biol.* Nature Publishing Group; 2009;11: 859–64.
- 590           doi:10.1038/ncb1894
- 591    10.    Firmino AAP, Fonseca FC de A, de Macedo LLP, Coelho RR, Antonino de Souza Jr JD,
- 592           Togawa RC, et al. Transcriptome Analysis in Cotton Boll Weevil (*Anthonomus grandis*)
- 593           and RNA Interference in Insect Pests. *PLoS One.* 2013;8: e85079.
- 594           doi:10.1371/journal.pone.0085079
- 595    11.    da Silva SM, Vincent J-P. Oriented cell divisions in the extending germband of
- 596           &lt;em&gt;*Drosophila*</em&gt; Development. 2007;134: 3049 LP-3054. Available:
- 597           <http://dev.biologists.org/content/134/17/3049.abstract>
- 598    12.    Liu PZ, Kaufman TC. Short and long germ segmentation: unanswered questions in the
- 599           evolution of a developmental mode. *Evol Dev.* 2005;7: 629–46. doi:10.1111/j.1525-
- 600           142X.2005.05066.x
- 601    13.    Sarrazin AF, Peel AD, Averof M. A segmentation clock with two-segment periodicity in
- 602           insects. *Science.* 2012;336: 338–41. doi:10.1126/science.1218256
- 603    14.    Benton MA, Akam M, Pavlopoulos A. Cell and tissue dynamics during *Tribolium*
- 604           embryogenesis revealed by versatile fluorescence labeling approaches. *Development.*
- 605           2013;140: 3210–3220. doi:10.1242/dev.096271
- 606    15.    Nakamoto A, Hester SD, Constantinou SJ, Blaine WG, Tewksbury AB, Matei MT, et al.
- 607           Changing cell behaviours during beetle embryogenesis correlates with slowing of
- 608           segmentation. *Nat Commun.* Nature Publishing Group; 2015;6: 6635.
- 609           doi:10.1038/ncomms7635

- 610 16. Paré AC, Vichas A, Fincher CT, Mirman Z, Farrell DL, Mainieri A, et al. A positional Toll  
611 receptor code directs convergent extension in *Drosophila*. *Nature*. 2014;515: 523–  
612 527. doi:10.1038/nature13953
- 613 17. Benton MA, Pechmann M, Frey N, Stappert D, Conrads KHKH, Chen Y-TY-T, et al. Toll  
614 Genes Have an Ancestral Role in Axis Elongation. *Curr Biol*. Elsevier Ltd; 2016;26:  
615 1609–1615. doi:10.1016/j.cub.2016.04.055
- 616 18. Campos-Ortega J a, Hartenstein V. The embryonic development of *Drosophila*  
617 *melanogaster*. 2nd ed. Springer-Verlag Berlin Heidelberg; 1997.
- 618 19. Schönauer A, Paese CLB, Hilbrant M, Leite DJ, Schwager EE, Feitosa NM, et al. The Wnt  
619 and Delta-Notch signalling pathways interact to direct pair-rule gene expression via  
620 caudal during segment addition in the spider *Parasteatoda tepidariorum*.  
621 *Development*. 2016; 2455–2463. doi:10.1242/dev.131656
- 622 20. Janssen R. Gene expression suggests double-segmental and single-segmental  
623 patterning mechanisms during posterior segment addition in the beetle *Tribolium*  
624 *castaneum*. *Int J Dev Biol*. 2014;58. doi:10.1387/ijdb.140058rj
- 625 21. Clark E. Dynamic patterning by the *Drosophila* pair-rule network reconciles long-germ  
626 and short-germ segmentation. Desplan C, editor. *PLOS Biol*. 2017;15: e2002439.  
627 doi:10.1371/journal.pbio.2002439
- 628 22. van der Zee M, Berns N, Roth S. Distinct Functions of the *Tribolium zerknüllt* Genes in  
629 Serosa Specification and Dorsal Closure. *Curr Biol*. 2005;15: 624–636.  
630 doi:10.1016/j.cub.2005.02.057
- 631 23. Falciani F, Hausdorf B, Schröder R, Akam M, Tautz D, Denell R, et al. Class 3 Hox genes  
632 in insects and the origin of zen. *Proc Natl Acad Sci USA*. 1996;93: 8479–8484.
- 633 24. Handel K, Grünfelder CG, Roth S, Sander K. *Tribolium* embryogenesis: a SEM study of

- 634 cell shapes and movements from blastoderm to serosal closure. *Dev Genes*. 2000;
- 635 25. Nunes da Fonseca R, von Levetzow C, Kalscheuer P, Basal A, van der Zee M, Roth S.
- 636 Self-Regulatory Circuits in Dorsoventral Axis Formation of the Short-Germ Beetle
- 637 *Tribolium castaneum*. *Dev Cell*. 2008;14: 605–615.
- 638 doi:<https://doi.org/10.1016/j.devcel.2008.02.011>
- 639 26. Schmidt-Ott U, Kwan CW. Morphogenetic functions of extraembryonic membranes in
- 640 insects. *Curr Opin Insect Sci*. Elsevier Inc; 2016;13: 86–92.
- 641 doi:[10.1016/j.cois.2016.01.009](https://doi.org/10.1016/j.cois.2016.01.009)
- 642 27. Panfilio K a. Extraembryonic development in insects and the acrobatics of
- 643 blastokinesis. *Dev Biol*. 2008;313: 471–91. doi:[10.1016/j.ydbio.2007.11.004](https://doi.org/10.1016/j.ydbio.2007.11.004)
- 644 28. Benton MA, Pavlopoulos A. *Tribolium* embryo morphogenesis: May the force be with
- 645 you. *Bioarchitecture*. 2014;4: 16–21. doi:[10.4161/bioa.27815](https://doi.org/10.4161/bioa.27815)
- 646 29. Schmidt-Ott U. The amnioserosa is an apomorphic character of cyclorrhaphan flies.
- 647 *Dev Genes Evol*. 2000;210: 373–376. doi:[10.1007/s004270000068](https://doi.org/10.1007/s004270000068)
- 648 30. Rafiqi AM, Lemke S, Ferguson S, Stauber M, Schmidt-Ott U. Evolutionary origin of the
- 649 amnioserosa in cyclorrhaphan flies correlates with spatial and temporal expression
- 650 changes of zen. *Proc Natl Acad Sci U S A*. 2008;105: 234–9.
- 651 doi:[10.1073/pnas.0709145105](https://doi.org/10.1073/pnas.0709145105)
- 652 31. Rafiqi AM, Park C, Kwan CW, Lemke S, Schmidt-ott U. BMP-dependent serosa and
- 653 amnion specification in the scuttle fly *Megaselia abdita*. 2012;3382: 3373–3382.
- 654 doi:[10.1242/dev.083873](https://doi.org/10.1242/dev.083873)
- 655 32. Kwan CW, Gavin-Smyth J, Ferguson EL, Schmidt-Ott U. Functional evolution of a
- 656 morphogenetic gradient. Bronner M, editor. *Elife*. eLife Sciences Publications, Ltd;
- 657 2016;5: e20894. doi:[10.7554/eLife.20894](https://doi.org/10.7554/eLife.20894)

- 658 33. Caroti F, González Avalos E, González Avalos P, Kromm D, Noeske V, Wosch M, et al. In  
659 toto live imaging in scuttle fly *Megaselia abdita* reveals transitions towards a novel  
660 extraembryonic architecture. *bioRxiv*. 2018; Available:  
661 <http://biorxiv.org/content/early/2018/01/15/236364.abstract>
- 662 34. Jacobs CGC, Spaik HP, van der Zee M. The extraembryonic serosa is a frontier  
663 epithelium providing the insect egg with a full-range innate immune response. *Elife*.  
664 2014;3: 1–21. doi:10.7554/eLife.04111
- 665 35. Jacobs CGC, Van Der Zee M. Immune competence in insect eggs depends on the  
666 extraembryonic serosa. *Dev Comp Immunol*. 2013;41. doi:10.1016/j.dci.2013.05.017
- 667 36. Lynch JA, Roth S. The evolution of dorsal-ventral patterning mechanisms in insects.  
668 *Genes Dev*. 2011;25: 107–118. doi:10.1101/gad.2010711
- 669 37. Horn T, Panfilio KA. Novel functions for Dorsocross in epithelial morphogenesis in the  
670 beetle *Tribolium castaneum*. *Development*. 2016;143: 3002–3011.  
671 doi:10.1242/dev.133280
- 672 38. Anderson DT. The Development of Holometabolous Insects. In: Counce SJ, Waddington  
673 CH, editors. *Developmental systems Insects, Vol 1*. New York: Academic Press; 1972.  
674 pp. 165–242.
- 675 39. Anderson DT. The Development of Hemimetabolous Insects. In: Counce SJ,  
676 Waddington CH, editors. *Developmental systems Insects, Vol 1*. New York: Academic  
677 Press; 1972. pp. 95–163.
- 678 40. Aranda M, Marques-Souza H, Bayer T, Tautz D. The role of the segmentation gene  
679 hairy in *Tribolium*. *Dev Genes Evol*. 2008;218: 465–77. doi:10.1007/s00427-008-0240-  
680 1
- 681 41. Benton MA. Fluorescent live imaging of differentially labeled *Tribolium* embryos

- 682 [Internet]. Database: figshare [Internet]. 2018. Available:  
683 [https://figshare.com/authors/Matthew\\_Benton/4693354](https://figshare.com/authors/Matthew_Benton/4693354)
- 684 42. Tomancak P, Berman BP, Beaton A, Weizmann R, Kwan E, Hartenstein V, et al. Global  
685 analysis of patterns of gene expression during *Drosophila* embryogenesis. *Genome*  
686 *Biol. England*; 2007;8: R145. doi:10.1186/gb-2007-8-7-r145
- 687 43. Hammonds AS, Bristow CA, Fisher WW, Weizmann R, Wu S, Hartenstein V, et al.  
688 Spatial expression of transcription factors in *Drosophila* embryonic organ  
689 development. *Genome Biol. England*; 2013;14: R140. doi:10.1186/gb-2013-14-12-r140
- 690 44. Tomancak P, Beaton A, Weizmann R, Kwan E, Shu S, Lewis SE, et al. Systematic  
691 determination of patterns of gene expression during *Drosophila* embryogenesis.  
692 *Genome Biol. England*; 2002;3: RESEARCH0088.
- 693 45. Sam S, Leise W, Hoshizaki DK. The serpent gene is necessary for progression through  
694 the early stages of fat-body development. *Mech Dev.* 1996;60: 197–205. Available:  
695 <http://www.ncbi.nlm.nih.gov/pubmed/9025072>
- 696 46. Sachs L, Chen YT, Drechsler A, Lynch JA, Panfilio KA, Lässig M, et al. Dynamic BMP  
697 signaling polarized by Toll patterns the dorsoventral axis in a hemimetabolous insect.  
698 *Elife.* 2015;4. doi:10.7554/eLife.05502
- 699 47. Handel K, Basal A, Fan X, Roth S. *Tribolium castaneum* twist: gastrulation and  
700 mesoderm formation in a short-germ beetle. *Dev Genes Evol.* 2005;215: 13–31.
- 701 48. van der Zee M, Stockhammer O, von Levetzow C, Nunes da Fonseca R, Roth S.  
702 Sog/Chordin is required for ventral-to-dorsal Dpp/BMP transport and head formation  
703 in a short germ insect. *Proc Natl Acad Sci U S A.* 2006;103: 16307–12.  
704 doi:10.1073/pnas.0605154103
- 705 49. Stappert D, Frey N, von Levetzow C, Roth S. Genome-wide identification of *Tribolium*

- 706 dorsoventral patterning genes. *Development*. 2016;143: 2443–2454.  
707 doi:10.1242/dev.130641
- 708 50. van der Zee M, Benton MA, Vazquez-Faci T, Lamers GEM, Jacobs CGC, Rabouille C.  
709 Innexin7a forms junctions that stabilize the basal membrane during cellularization of  
710 the blastoderm in *Tribolium castaneum*. *Development*. 2015;142: 2173–2183.  
711 doi:10.1242/dev.097113
- 712 51. Rauzi M, Krzic U, Saunders TE, Krajnc M, Zihlerl P, Hufnagel L, et al. Embryo-scale tissue  
713 mechanics during *Drosophila* gastrulation movements. *Nat Commun*. The Author(s);  
714 2015;6: 8677. Available: <http://dx.doi.org/10.1038/ncomms9677>
- 715 52. Leptin M, Grunewald B. Cell shape changes during gastrulation in *Drosophila*.  
716 *Development*. 1990;110: 73 LP-84. Available:  
717 <http://dev.biologists.org/content/110/1/73.abstract>
- 718 53. Roth S. Gastrulation in Other Insects. In: Stern CD, editor. *Gastrulation From Cells to*  
719 *Embryo*. New York: Cold Spring Harbor Laboratory Press; 2004. pp. 105–121.
- 720 54. Ewen-Campen B, Jones TEM, Extavour CG. Evidence against a germ plasm in the  
721 milkweed bug *Oncopeltus fasciatus*, a hemimetabolous insect. *Biol Open*. 2013;2:  
722 556–68. doi:10.1242/bio.20134390
- 723 55. Erezylmaz DF, Kelstrup HC, Riddiford LM. The nuclear receptor E75A has a novel pair-  
724 rule-like function in patterning the milkweed bug, *Oncopeltus fasciatus*. *Dev Biol*.  
725 Elsevier Inc.; 2009;334: 300–10. doi:10.1016/j.ydbio.2009.06.038
- 726 56. Liu PZ, Kaufman TC. even-skipped is not a pair-rule gene but has segmental and gap-  
727 like functions in *Oncopeltus fasciatus*, an intermediate germband insect.  
728 *Development*. 2005;132: 2081–92. doi:10.1242/dev.01807
- 729 57. Gillis WQ, Bowerman B a, Schneider SQ. The evolution of protostome GATA factors:

- 730 molecular phylogenetics, synteny, and intron/exon structure reveal orthologous  
731 relationships. *BMC Evol Biol.* 2008;8: 112. doi:10.1186/1471-2148-8-112
- 732 58. Nagai T, Ibata K, Park ES, Kubota M, Mikoshiba K, Miyawaki A. A variant of yellow  
733 fluorescent protein with fast and efficient maturation for cell-biological applications.  
734 *Nat Biotechnol.* Nature Publishing Group; 2002;20: 87. Available:  
735 <http://dx.doi.org/10.1038/nbt0102-87>
- 736 59. Clark E, Akam M. Odd-paired controls frequency doubling in *Drosophila* segmentation  
737 by altering the pair-rule gene regulatory network. *Elife.* England; 2016;5.  
738 doi:10.7554/eLife.18215
- 739 60. Schindelin J, Arganda-Carreras I, Frise E, Kaynig V, Longair M, Pietzsch T, et al. Fiji: an  
740 open-source platform for biological-image analysis. *Nat Methods.* 2012;9: 676–82.  
741 doi:10.1038/nmeth.2019
- 742 61. Meijering E, Dzyubachyk O, Smal I. Methods for cell and particle tracking. [Internet].  
743 1st ed. *Methods in enzymology.* United States: Elsevier Inc.; 2012. doi:10.1016/B978-  
744 0-12-391857-4.00009-4

745

746

747 **S1 Fig. Results of photoconversions at 50% egg length.** NLS-tdEos labelled extended  
748 germband stage *Tribolium* embryos in which a patch of blastoderm nuclei were  
749 photoconverted at 50% egg length (from the posterior pole) at different DV positions. The  
750 approximate DV position of the patch and the approximate DV width of the clone (in terms  
751 of nuclei number) are shown. The dorsal labelled embryo is shown from both sides to  
752 demonstrate the photoconverted nuclei cover the full DV extent of the amnion (arrows).  
753 Unconverted protein is shown in magenta, converted protein is shown in cyan. Images are



754 maximum intensity projections of one egg hemisphere. All eggs are oriented with the  
755 anterior to the left and ventral to the bottom. Scale bars are 100  $\mu\text{m}$ .

756

757 **S2 Fig. Results of photoconversions at 25% egg length.** NLS-tdEos labelled extended  
758 germband stage *Tribolium* embryos in which a patch of blastoderm nuclei were  
759 photoconverted at 25% egg length (from the posterior pole) at different DV positions. The  
760 approximate DV position of the patch and the approximate DV width of the clone (in terms  
761 of nuclei number) are shown. Unconverted protein is shown in magenta, converted protein  
762 is shown in cyan. Images are maximum intensity projections of one egg hemisphere. All eggs  
763 are oriented with the anterior to the left and ventral to the bottom. Scale bars are 100  $\mu\text{m}$ .

764

765 **S3 Fig. Results of photoconversions near the posterior pole.** NLS-tdEos labelled extended  
766 germband stage *Tribolium* embryos in which a patch of blastoderm nuclei were  
767 photoconverted near the posterior pole at different DV positions. The approximate DV  
768 position of the patch and the approximate DV width of the clone (in terms of nuclei number)  
769 are shown. The second dorsally labelled embryo is shown at high magnification at two  
770 timepoints and with a transverse section (at the position of the dashed green line) to show  
771 the movement of tissue from the dorsal epithelium into the hindgut. Unconverted protein is  
772 shown in magenta, converted protein is shown in cyan. Images are maximum intensity  
773 projections of one egg hemisphere except for the bottom three embryos, which are shown  
774 as maximum intensity projects through the germband in order to better show the labelled  
775 nuclei. All eggs are oriented with the anterior to the left and ventral to the bottom except  
776 for the second timepoint of the second dorsal view, which is shown with the posterior of the  
777 germband to the left. Scale bars are 100  $\mu\text{m}$ .

778

779 **S4 Fig. RNA expression of the *Tribolium* ortholog of the GATA factor *serpent*.** (A-F) whole  
780 mount and (G-J) flatmount *Tribolium* embryos from the pre-blastoderm to the retracting  
781 germband stage stained for *Tc-srp* mRNA (red) and nuclei (DAPI, blue). (G<sub>1</sub>) and (G<sub>2</sub>) show  
782 the same embryo imaged from both sides. (H<sub>1</sub>) and (H<sub>2</sub>) show projections from the dorsal  
783 epithelium (H<sub>1</sub>) and the ventral epithelium (H<sub>2</sub>) of the same embryo. *Tc-srp* mRNA is  
784 maternally provided (A), and expression is ubiquitous until the late blastoderm stage (B-C)  
785 when expression clears from the blastoderm but persists in the yolk nuclei (scattered spots  
786 in (D-E)). During embryo condensation, *de novo* expression arises in a patch of blastoderm  
787 cells at the anterior medial region (arrowhead in F). This patch of *Tc-srp* expressing cells  
788 invaginates as part of the ventral furrow and becomes located beneath the ectoderm  
789 (arrowhead in G<sub>1</sub>-H<sub>3</sub>). This expression domain is likely homologous to the anterior ventral  
790 expression domain in *Drosophila* that marks the prohemocytes. During serosa window  
791 closure, expression appears in a ring of dorsal epithelium cells (G<sub>1</sub>). After serosa window  
792 closure, expression persists in the dorsal epithelium (H<sub>1</sub>) and (H<sub>3</sub>). Unlike *Drosophila*, there is  
793 no expression domain at the posterior of the blastoderm (E) or the early germband (G<sub>2</sub>).  
794 After germband elongation, a *de novo* expression domain appears at the posterior most  
795 point of the embryo (I<sub>1</sub>). Given the location of this domain at the base of the forming  
796 hindgut, this is likely the posterior endoderm primordium. Expression can also be seen in a  
797 patch of amnion that has remained attached to the germband (arrow in I<sub>2</sub>), but most of the  
798 rest of the amnion has been lost. Several other regions of expression can be seen, including  
799 in the presumptive fat body (the segmental domains running down the body), in  
800 presumptive hemocyte clusters (the two side-by-side domains in the anterior), and in an  
801 anterior domain that may mark the anterior endoderm primordium. Expression also persists

802 in the yolk nuclei (visible in the remaining yolk fragments at the anterior of the germband in  
803 I<sub>1</sub>). All embryos are shown with anterior to the left. (E-E'') is oriented with the ventral to the  
804 bottom, (F-F'') is oriented as a ventral view. (H<sub>3</sub>-H<sub>3</sub>'') is an optical sagittal section at  
805 approximately the midline of the embryo in (H<sub>2</sub>). (A-F) are maximum intensity projections of  
806 one egg hemisphere. (G<sub>1</sub>-G<sub>2</sub>''), (I<sub>1</sub>-I<sub>1</sub>'') and (J-J'') are maximum intensity projections of  
807 flatmounted germbands. (I<sub>2</sub>-I<sub>2</sub>'') is a maximum intensity projection of part of the germband  
808 to better show the amnion/dorsal epithelium. Scale bars are 50 μm.

809 **S5 Fig. Schematics showing the photoconversion approach to determine the amnion**  
810 **fatemap.** A patch of nuclei (of known dimensions) was photoconverted at the blastoderm  
811 stage, then the same embryos were examined at the end of germband extension. In  
812 embryos where all photoconverted nuclei were located in the amnion and these nuclei  
813 spanned the entire DV width of the amnion (as shown here), the number of nuclei initially  
814 photoconverted was used to determine the DV width of the blastoderm domain giving rise  
815 to the amnion. Note that the precise number and distribution of nuclei shown here were  
816 arbitrarily chosen. Blue shows photoconverted nuclei, yellow shows the yolk. The serosa is  
817 omitted from the bottom panels.

818

819 **S6 Fig. Extended schematics showing the classic and revised *Tribolium* amnion fatemaps**  
820 **and germband models.** Schematics drawn as in Fig 1 to show the classic and revised  
821 fatemaps and germband models based on the results of this manuscript. The schematics of  
822 the flatmounted germbands are drawn with the focus on the dorsal epithelium. See text for  
823 additional details.

824

825 **S7 Fig. Tissue specific cell shape changes during *Tribolium* condensation.** Stills from  
826 timelapses of two *Tribolium* embryos transiently expressing GAP43YFP to label membranes.  
827 The second panel of each timepoint shows optical transverse sections at the position of the  
828 dashed line in the related panel. Ventral and lateral ectoderm becomes columnar, while  
829 dorsal ectoderm becomes flattened. The non-columnar cells at the bottom of the left hand  
830 embryo are likely the presumptive mesoderm. The first frame of the timelapses was defined  
831 as timepoint 0. Both embryos are oriented with the anterior to the left and ventral to the  
832 bottom. Abbreviations are: Dorsal (Dor), Lateral (Lat), Ventral (Ven) and Ectoderm (Ect).  
833 Scale bars are 100  $\mu\text{m}$ .

834

835

836 **S1 Movie.** Confocal timelapse of a *Tribolium* embryo transiently expressing H2B-ven to mark  
837 nuclei. A maximum intensity projection of one egg hemisphere is shown. Anterior is to the  
838 left, the ventral side of the egg is to the bottom.

839

840 **S2 Movie.** Same timelapse as Supplementary Movie 1, but with nuclei of the dorsal  
841 epithelium tracked until they join the ventral epithelium. Nuclei that join the ventral  
842 epithelium are labelled magenta, nuclei that become located at the edge of the germband  
843 are labelled yellow, nuclei that remain in the dorsal epithelium are labelled cyan. Anterior is  
844 to the left, the ventral side of the egg is to the bottom. See Fig 2(A-C) for more details.

845

846 **S3 Movie.** Same timelapse as Supplementary Movie 1, but with a line of nuclei of the dorsal  
847 epithelium tracked. Nuclei that remain in the dorsal epithelium are labelled cyan. Anterior is  
848 to the left, the ventral side of the egg is to the bottom. See Fig 2(D-F) for more details.

849

850 **S4 Movie.** Confocal timelapse of a *Tribolium* embryo transiently expressing NLS-tdEos  
851 (magenta) with a line of blastoderm cells photoconverted (cyan). The brightness increases  
852 approximately halfway through the movie due to a manual increase in laser power at this  
853 point. A maximum intensity projection of one egg hemisphere is shown. Anterior is to the  
854 left, the ventral side of the egg is to the bottom.

855

856 **S5 Movie.** Confocal timelapse of a *Tribolium* embryo transiently expressing NLS-tdEos  
857 (magenta) with a patch of blastoderm cells photoconverted (cyan). (A) shows a maximum  
858 intensity projection of one egg hemisphere is shown. (B) shows an optical transverse section.  
859 (C) shows an average intensity projection of 10 optical transverse sections. Anterior is to the  
860 left, the ventral side of the egg is to the bottom. See Fig 3(A-F) for more details.

861

862 **S6 Movie.** Confocal timelapse of a *Tribolium* embryo expressing NLS-tdEos showing the SAZ  
863 during abdominal segment formation. Coloured points mark tracked nuclei. The embryo is  
864 oriented based on polarity of the visible region of the germband with posterior to the right  
865 and lateral to the top. Panels show maximum intensity projections of 15  $\mu\text{m}$  to specifically  
866 show the germband. See Fig 4 for more details.

867

868 **S7 Movie.** Confocal timelapse of a *Tribolium* embryo transiently expressing NLS-tdEos  
869 (magenta) with a patch of blastoderm cells photoconverted (cyan). Towards the end of the  
870 timelapse, the cyan nuclei in the dorsal epithelium appear to condense posteriorly to the  
871 hindgut. A maximum intensity projection of one egg hemisphere is shown. Anterior is to the  
872 left, the ventral side of the egg is to the bottom.

873

874 **S1 Text. Extended discussion of topics from Discussion section 'A revised understanding of**  
875 **the short germ embryo'.**

876 **S2 Text. Extended discussions of topics from Discussion section 'Cellular and molecular**  
877 **causes of tissue flow'.**

878 **S3 Text. Extended discussions of topics from Discussion section 'Reconciling long and short**  
879 **germ development'.**

880

# *Drosophila*

# *Tribolium*

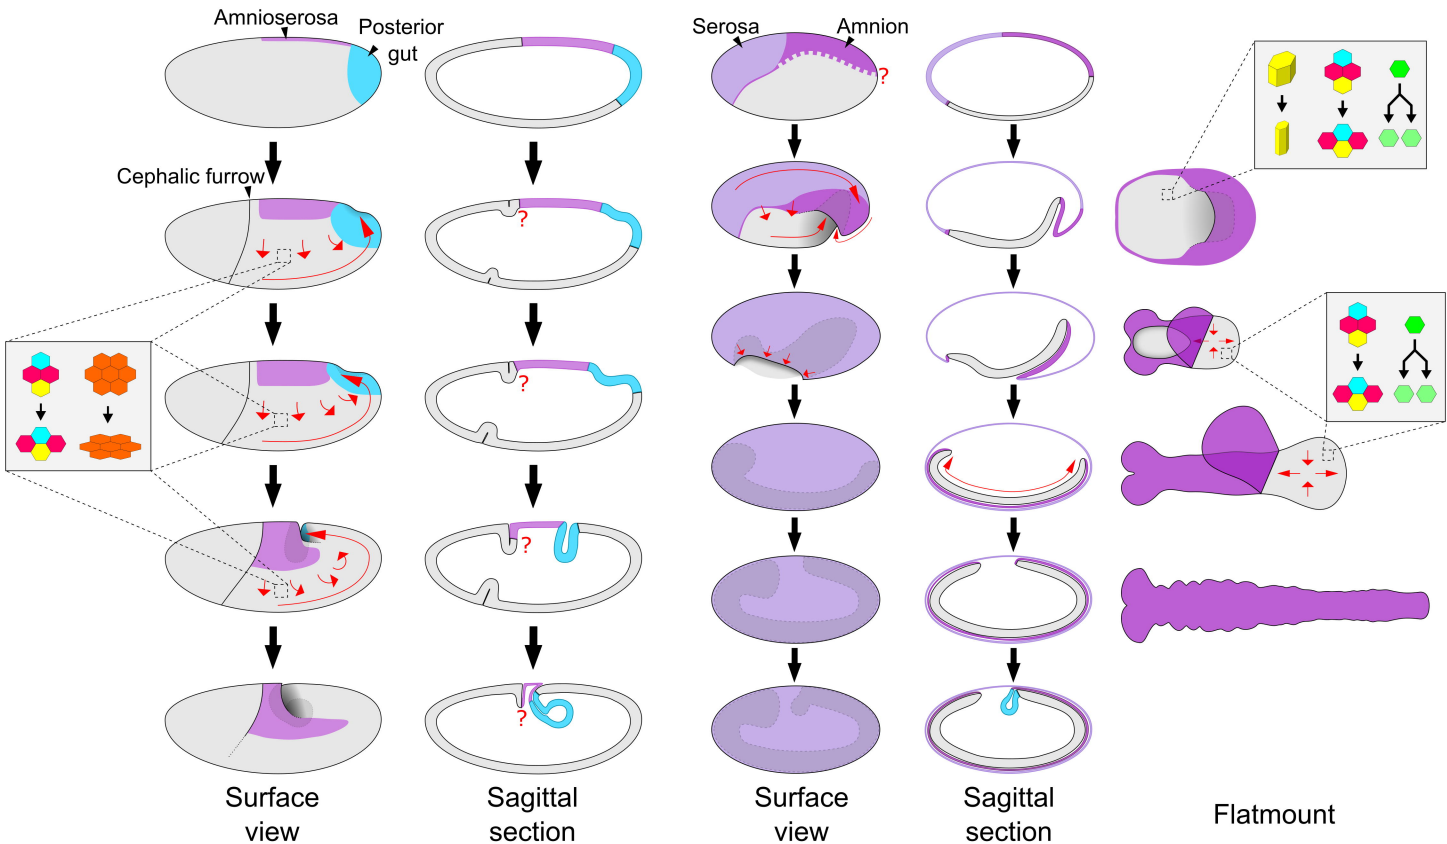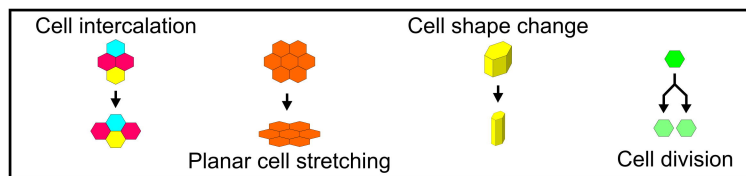

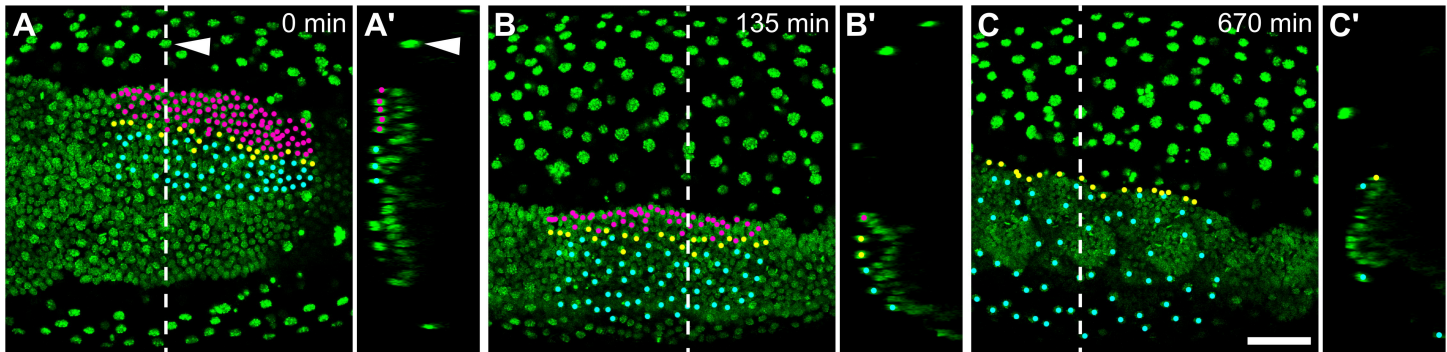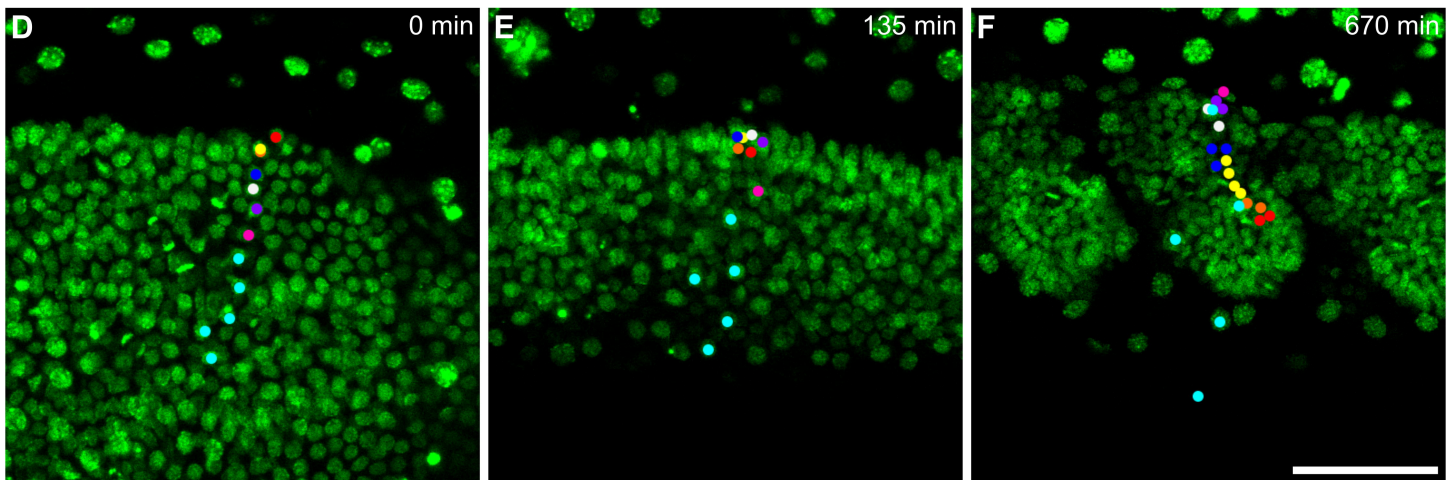



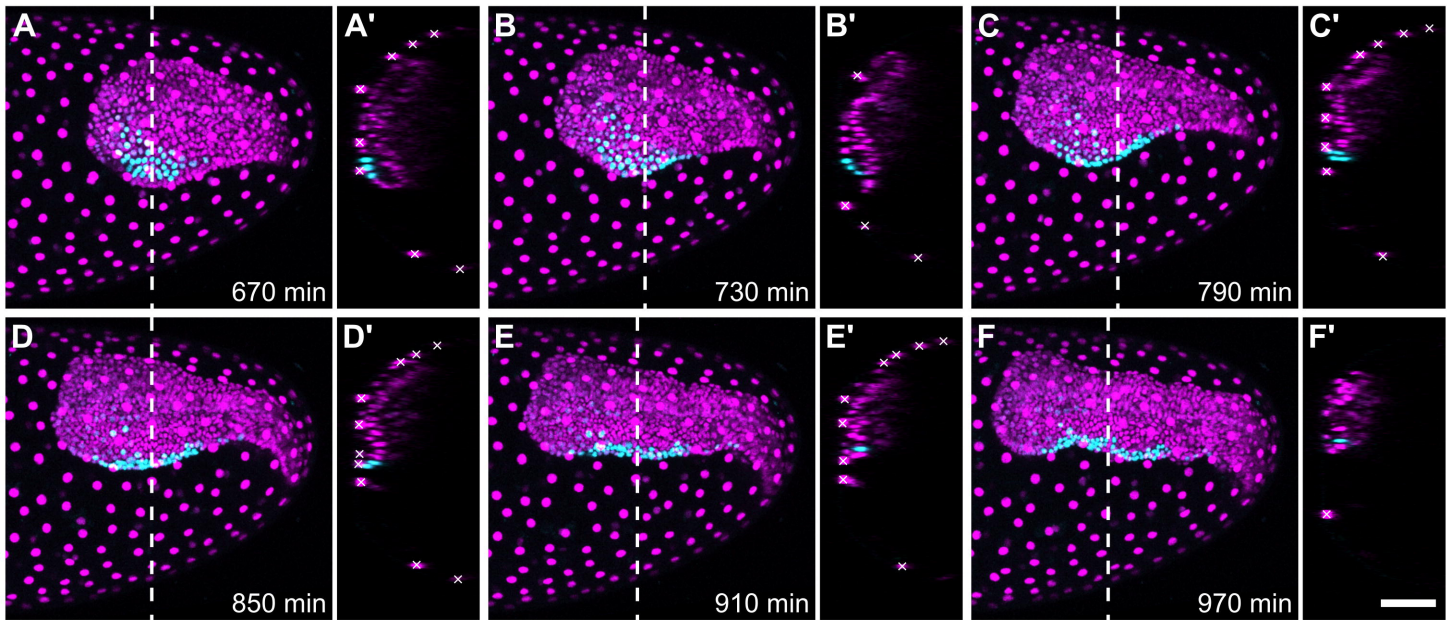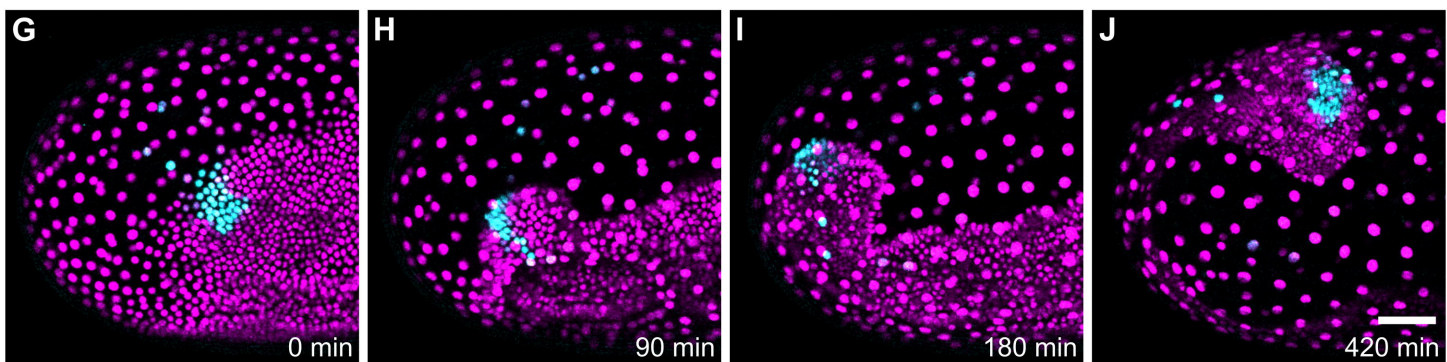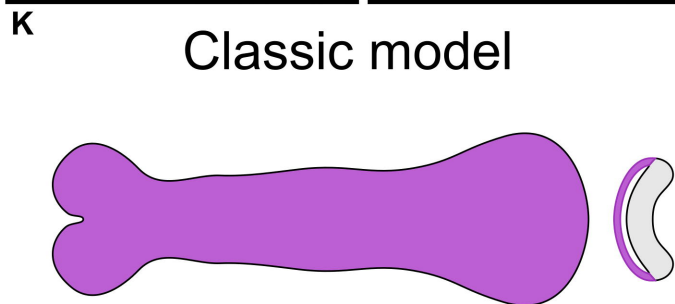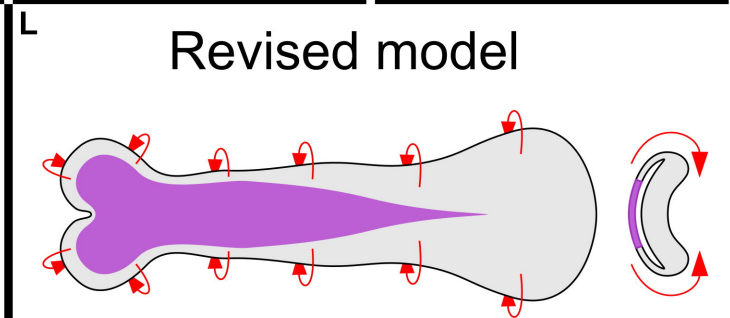

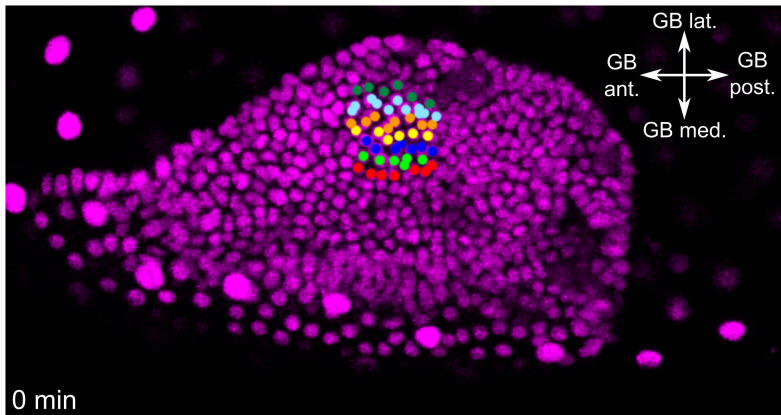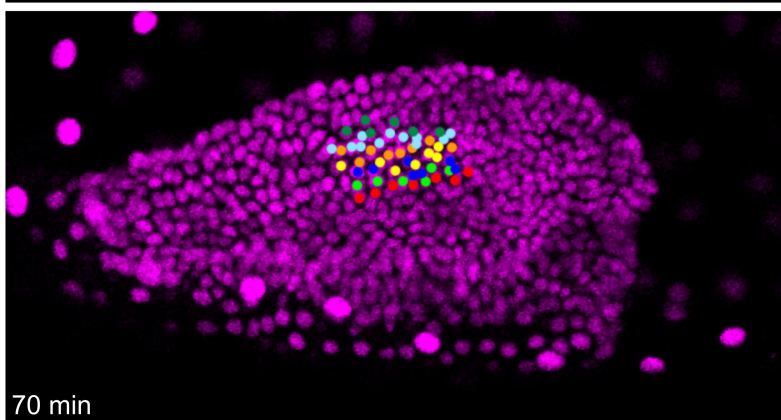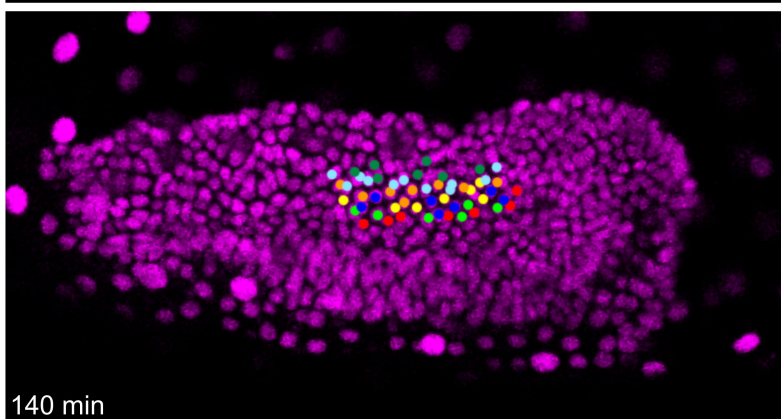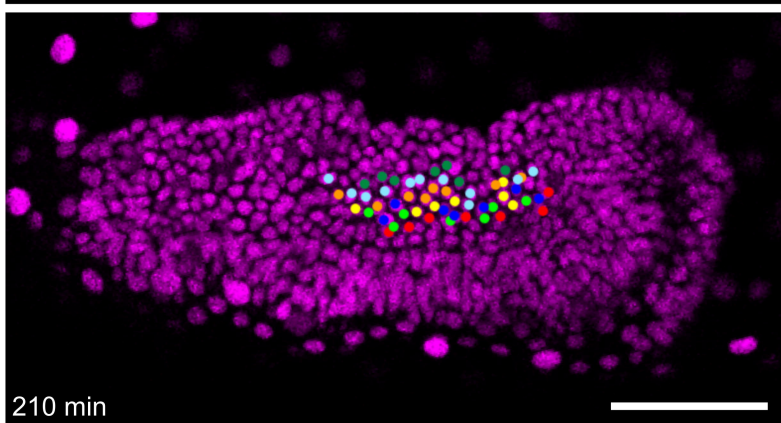

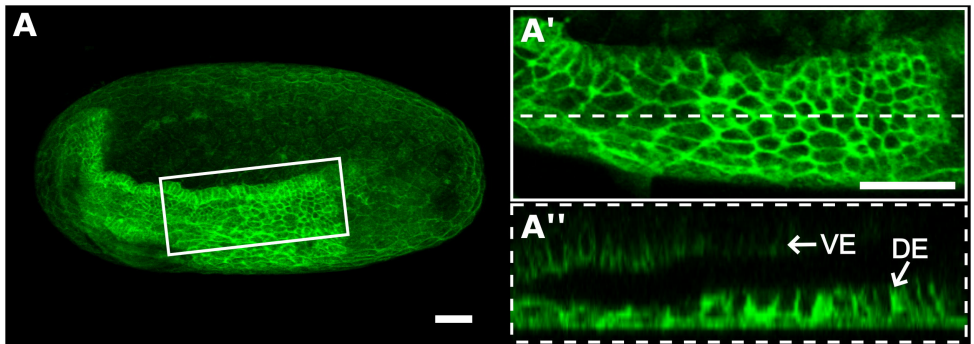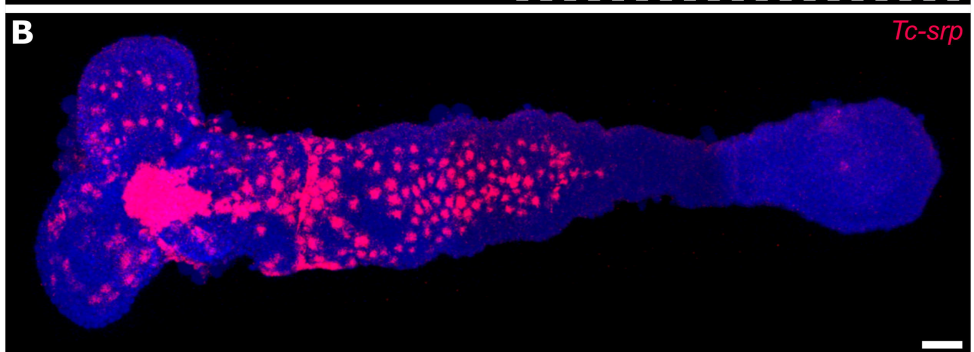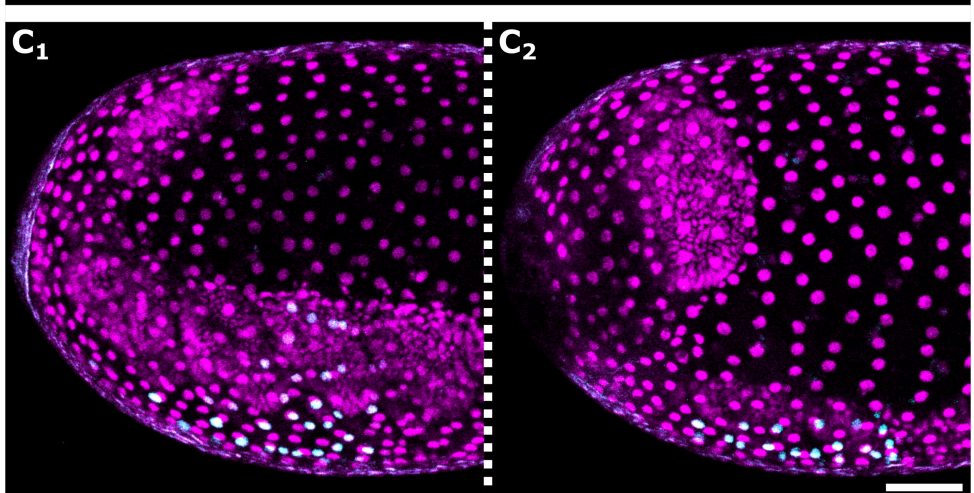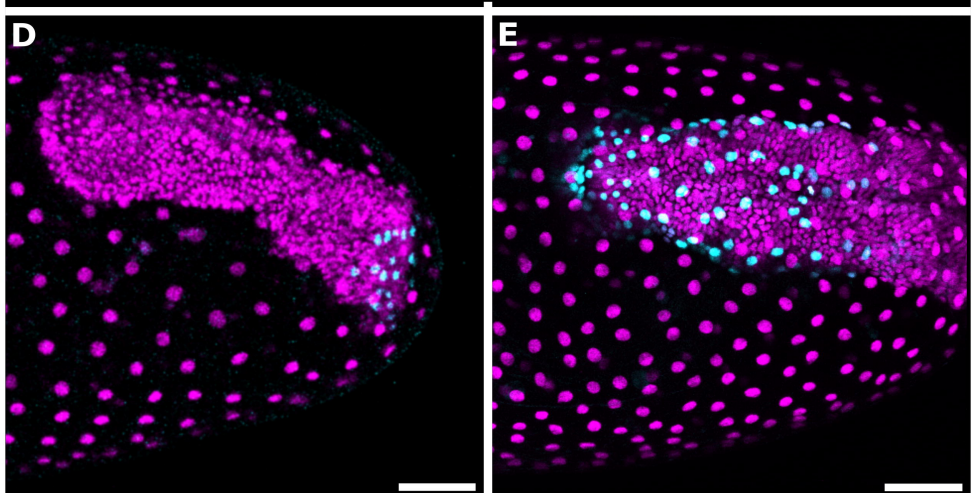

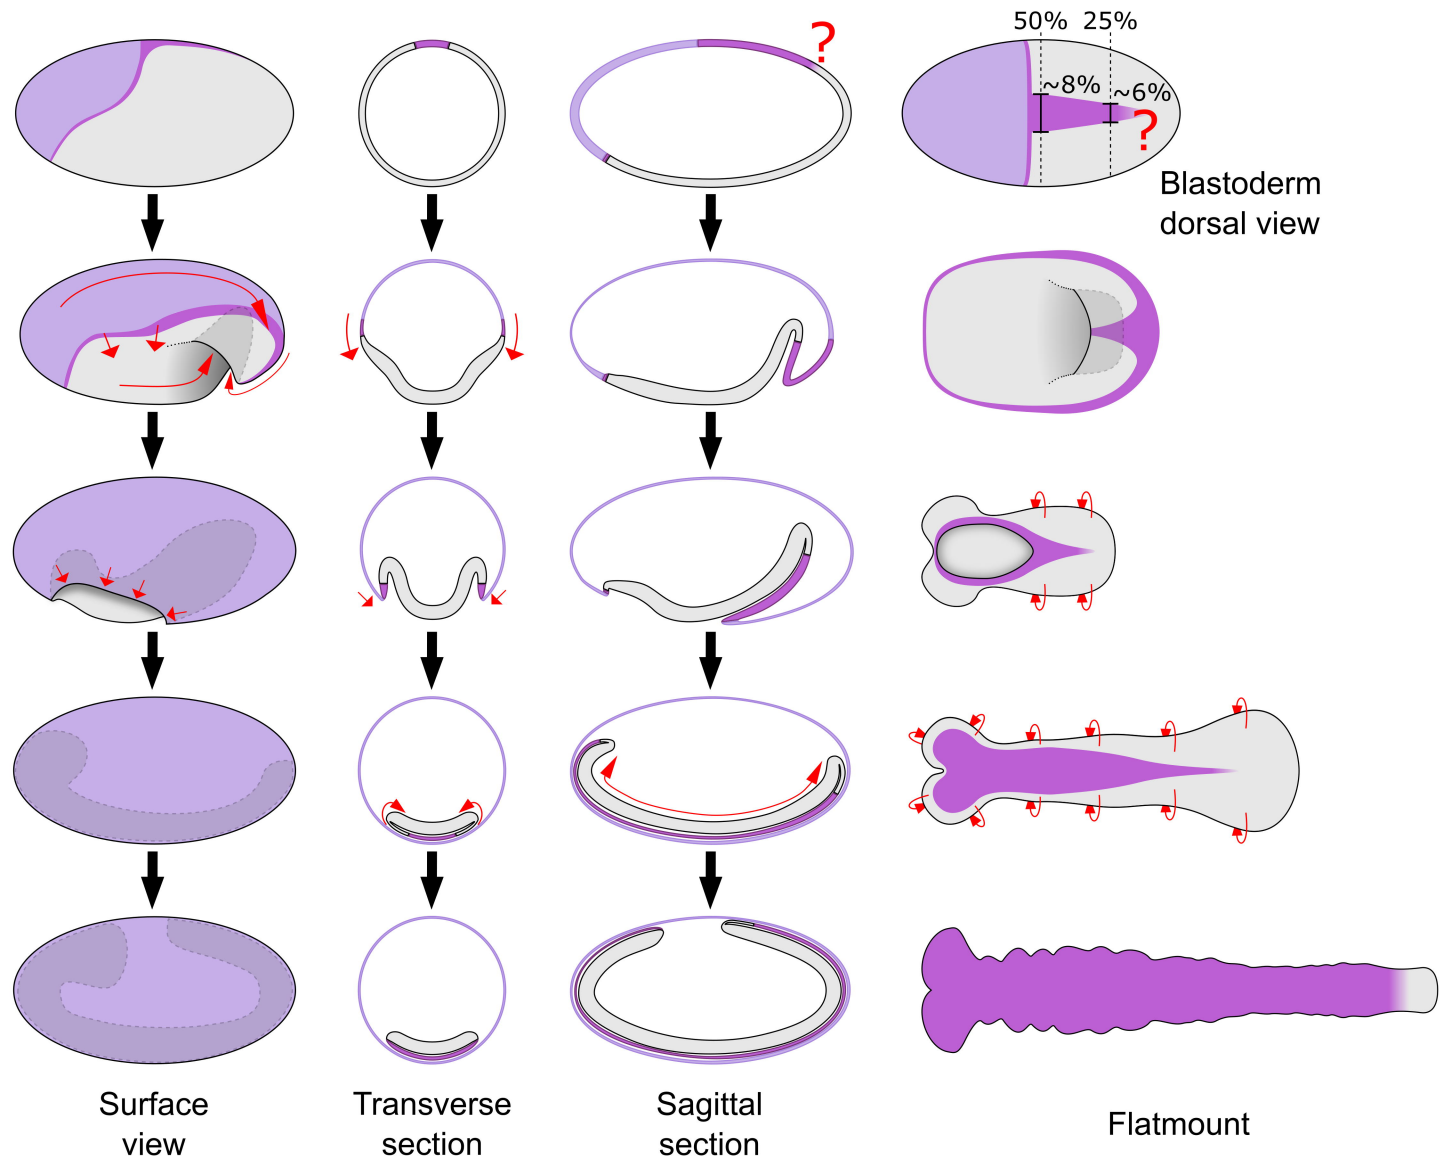

Source: https://www.biorxiv.org/content/10.1101/232751v3.full.pdf
